# Supplementary material
Source: PubMed Central journal article supplement (PMC4529629)
Supplement: ajcr0005-2098-f8.pdf [file ajcr0005-2098-f8.pdf]

## Nodal promotes EMT

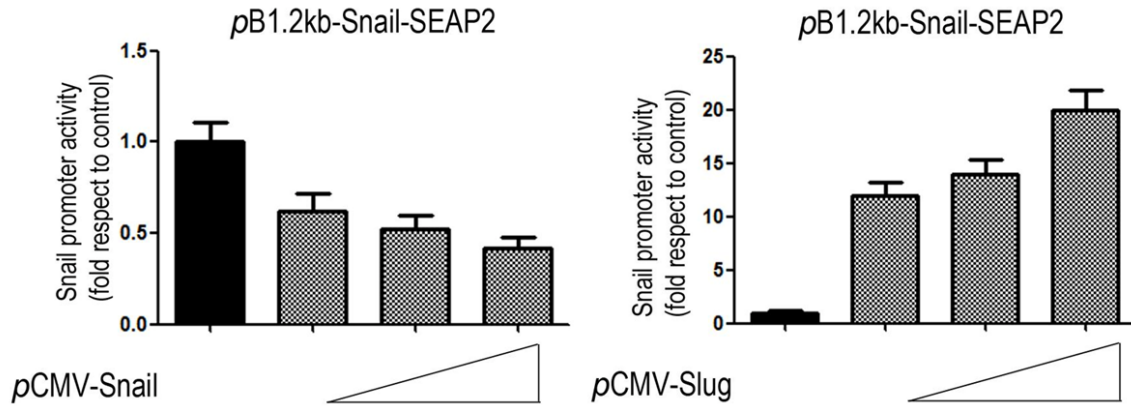

**Figure S1.** Activity of the *pB1.2kb-Snail-SEAP2* was determined in B16 cells by transient transfection; when indicated, Snail or Slug was co-transfected at several concentrations. After transfection, cells were incubated for 24 hours, and promoter activities were measured. Black bars correspond to activity of promoter in the absence of Snail1 or Slug co-transfection.
